# Supplementary material for: An integrated transcriptional analysis of the developing human retina
Source: Oxford University Press journal article supplement (doi:10.1242/dev.169474), 2019-01-15
Supplement: dev169474supp.pdf [file dev169474supp.pdf]

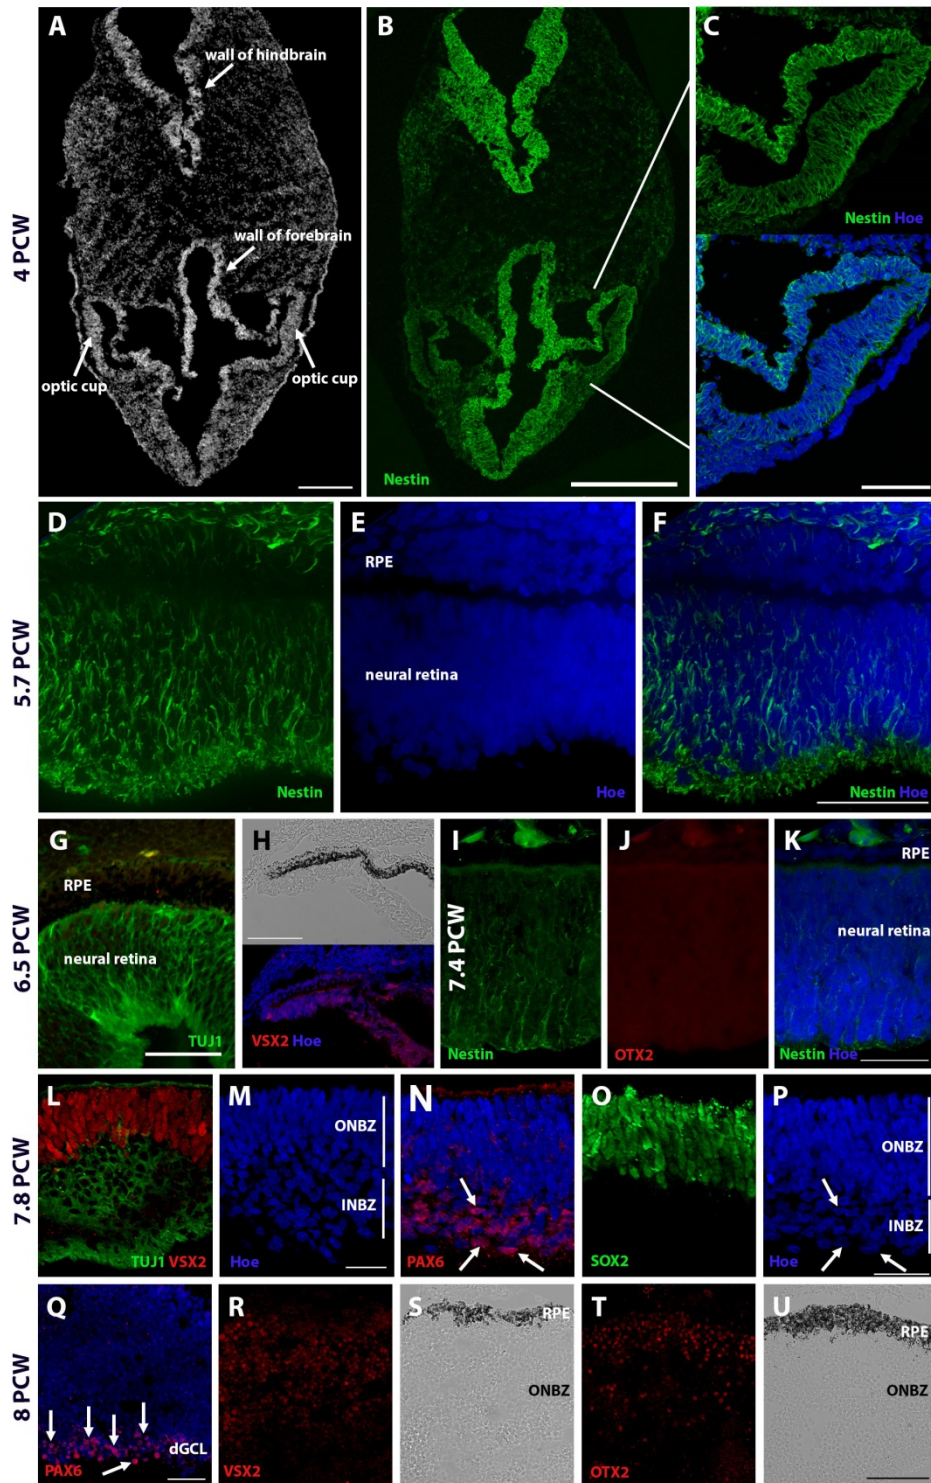

**Figure S1. IHC analysis of sections through human embryonic brain and optic cups from 4 to 8 PCW.**

(A-C) A horizontal section through the embryonic brain at 4 PCW showing the bilateral appearance

of the developing optic cup, just prior to invagination. The optic cup and walls of the fore- and hindbrain are strongly immunopositive for the neural progenitor marker nestin. Sagittal sections through the optic cup showing the expression of TUJ1 (**G, L**), VSX2 (**H, L, R**), nestin (**D-F, I, K**), OTX2 (**J, T**), PAX6 (**N, Q**), and SOX2 (**O**) from 5.7 – 8 PCW. (C, E, F, H, K, M, P, Q) Hoechst staining is shown in blue. (H, S, U) bright phase microphotographs showing RPE. (Q, N) White arrows indicate PAX6 positive cells. Scale bars: A, B = 200 $\mu$ m, C, D, F, H, U = 100 $\mu$ m, G, K, P, Q = 50 $\mu$ m.

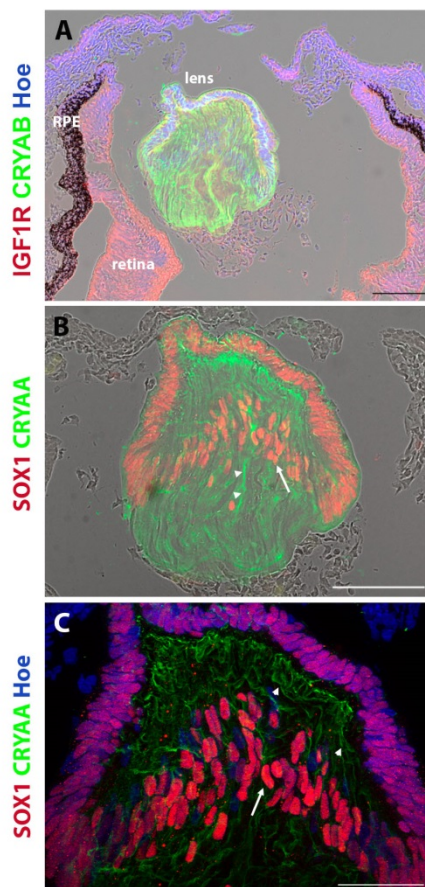

**Figure S2.** IHC expression analysis with IGF1R and lens markers CRYAB (A) and SOX1 and CRYAA at 6.3 PCW (B, C). Lens fibers are depicted by arrowheads and nuclei comprising the lens bow with arrows. Scale bars: A, B = 100 $\mu$ m, C = 50 $\mu$ m.

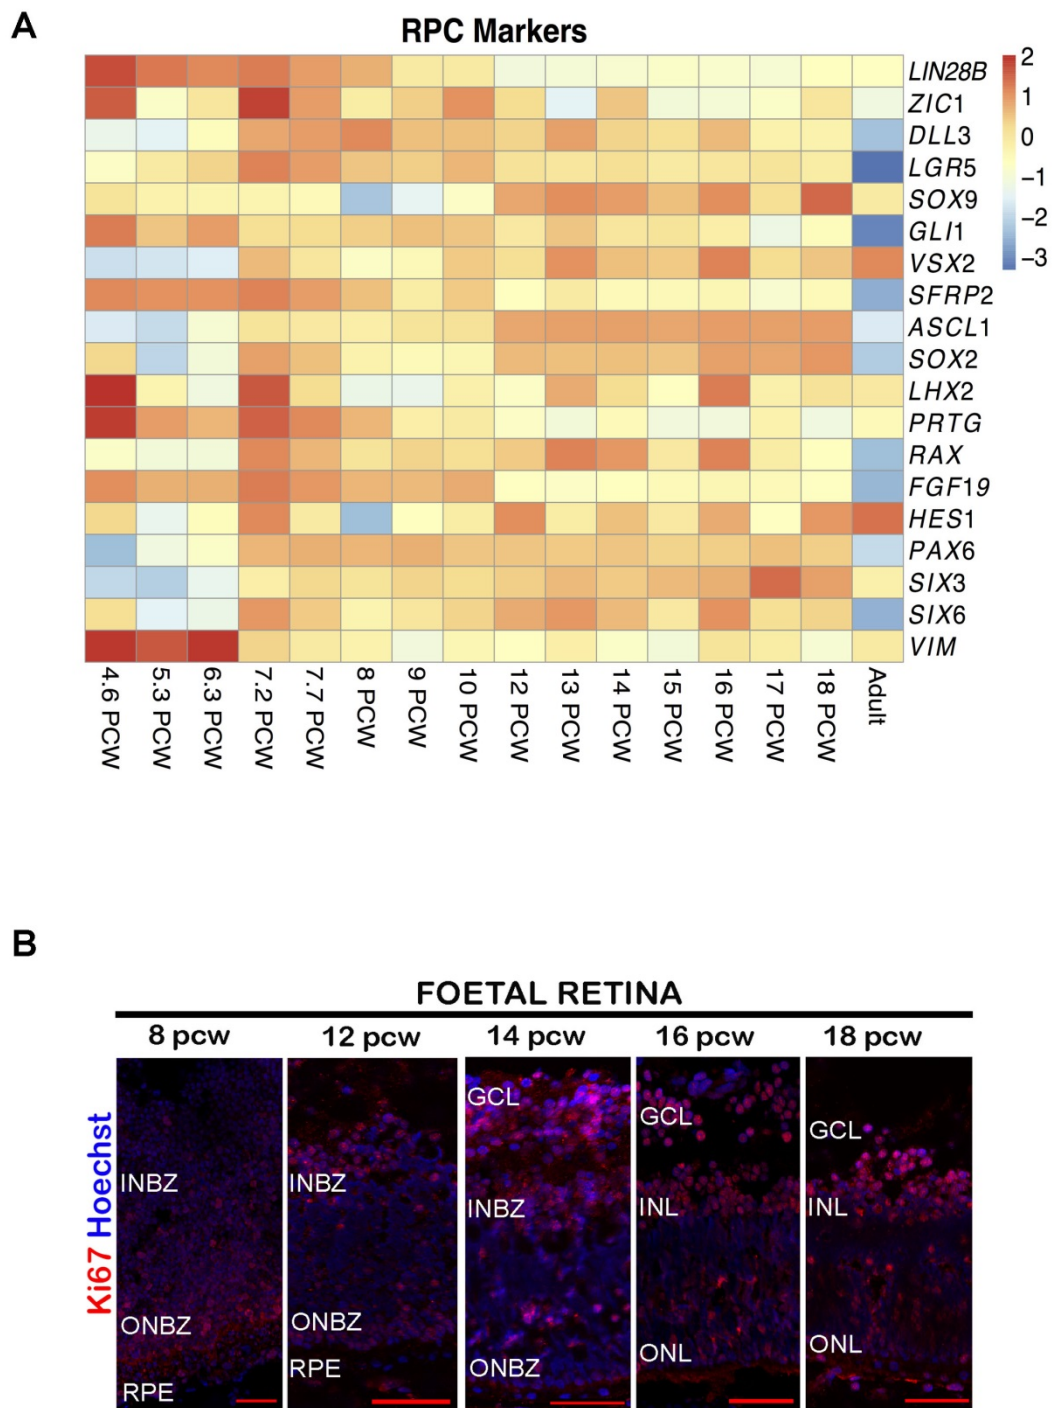

**Figure S3. Expression of RPC markers during human retinogenesis. (A)** Heatmap gene expression with RPC markers plotted as log<sub>2</sub>transformed counts per million (cpm) at each developmental stage. Blue to red represents low to high gene expression. **(B)** Ki67 immunostaining from 8-18 PCW of human retinal development. Scale bars 50  $\mu$ m.

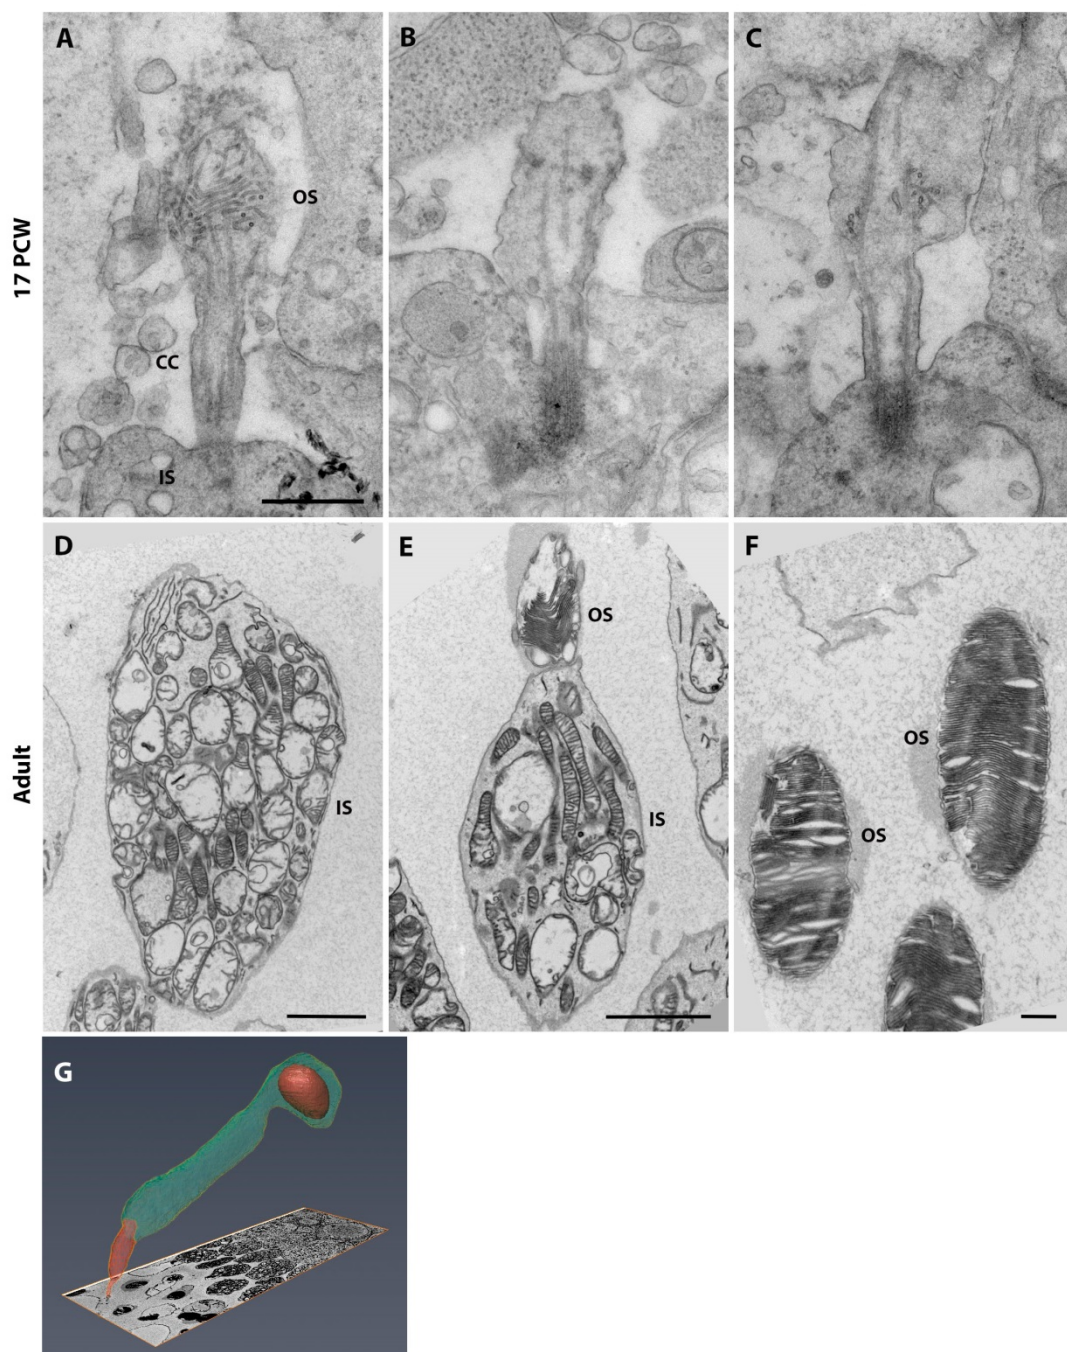

**Figure S4.** TEM analysis of a fetal retina at PCW17 (A-C) and adult retina (D-F). (G) 3D reconstruction of a cone photoreceptor from adult retina. OS - outer segments, cc- connecting cilia, is – inner segments. Scale bars: A-C, F = 500nm, D, E = 2 $\mu$ m.

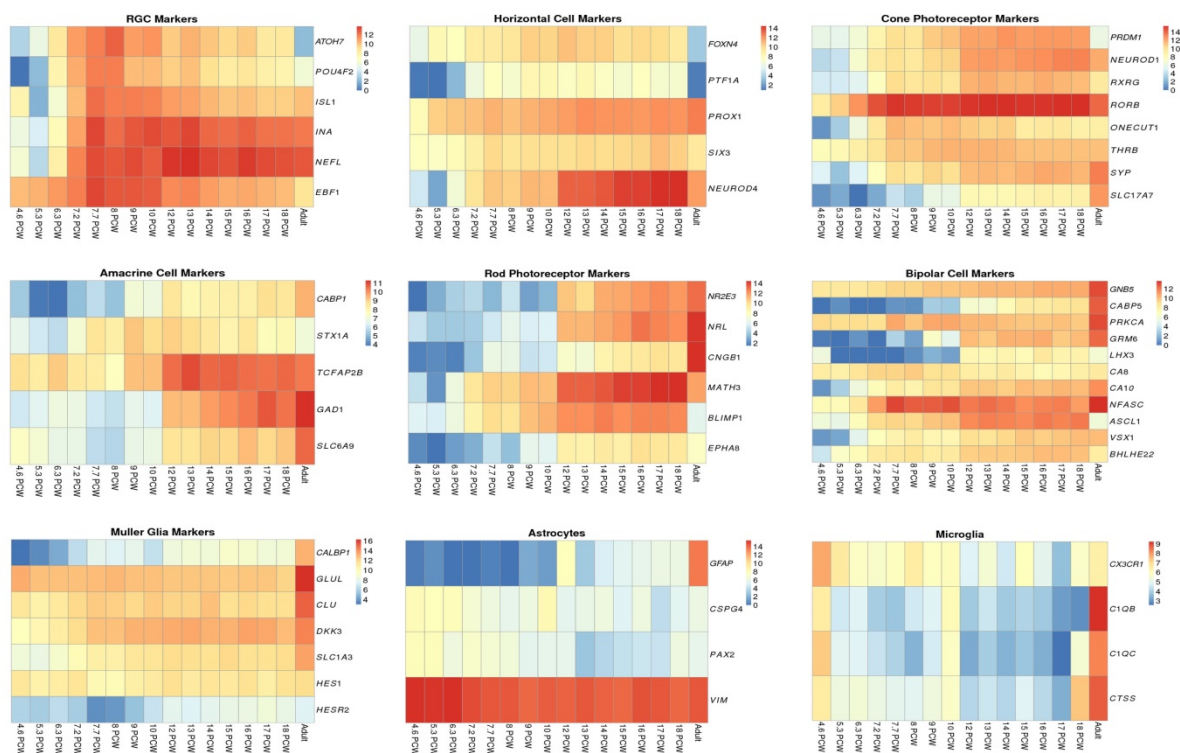

**Figure S5.** Heatmap gene expression with retinal cell markers plotted as log<sub>2</sub>transformed counts per million (cpm) at each developmental stage. Blue to red represents low to high gene expression.

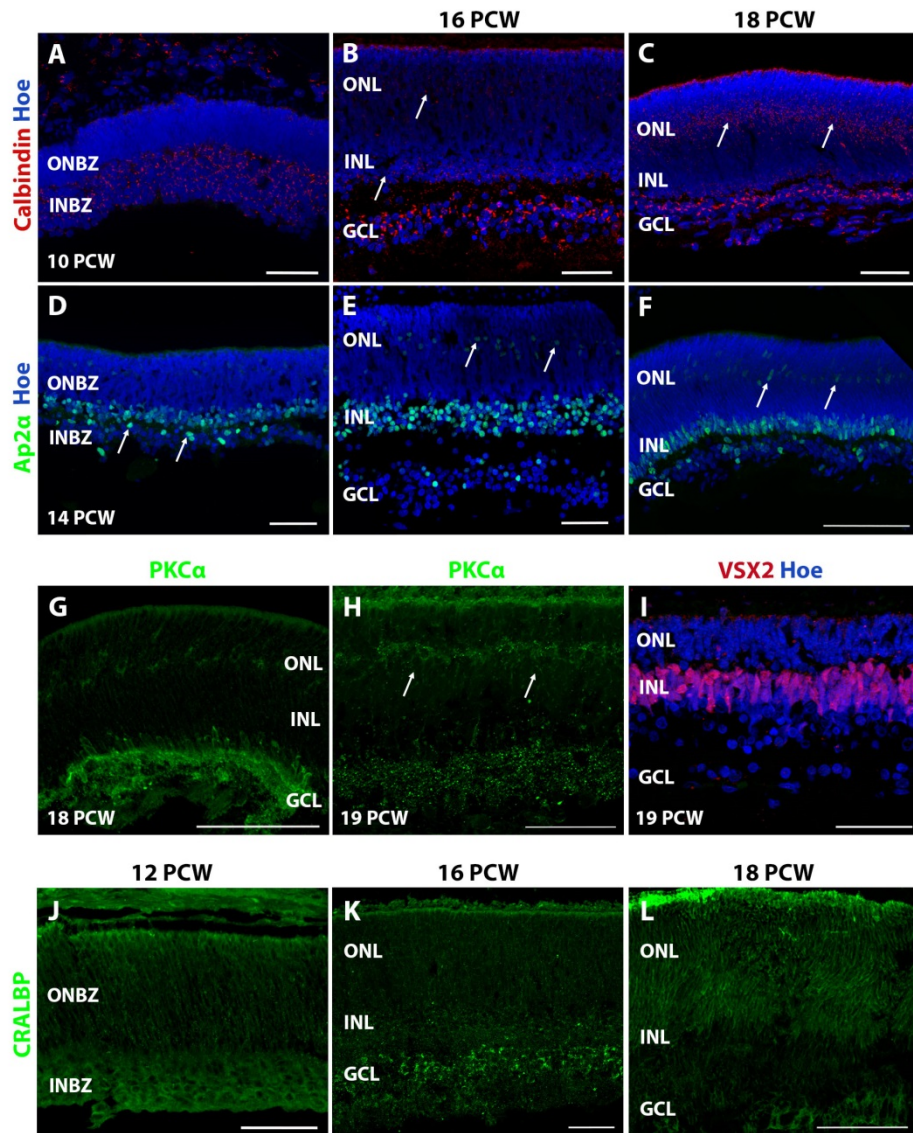

**Figure S6.** (A) IHC expression analysis with markers for amacrine and horizontal cells (A-F), bipolar cells (G-I), and Müller glia cells (J-L). Scale bars: A-E, H, I, J-L= 50µm, F, G, 100µm.

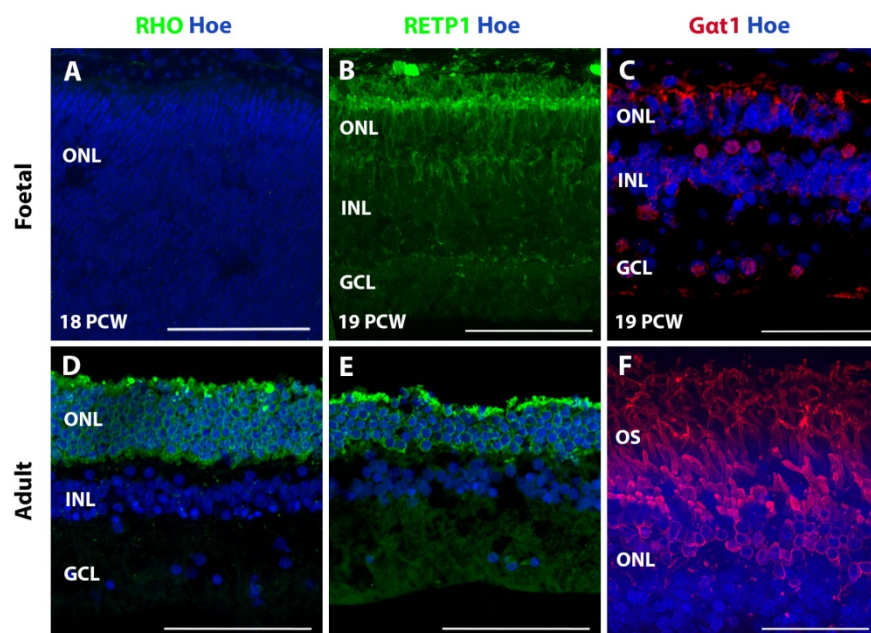

**Figure S7.** IHC expression analysis with rod markers (RHO, RETP1, GαT1) in fetal retina (A-C) and adult retina (D-F). Scale bars: C, F = 50µm, A, B, D, E = 100µm.



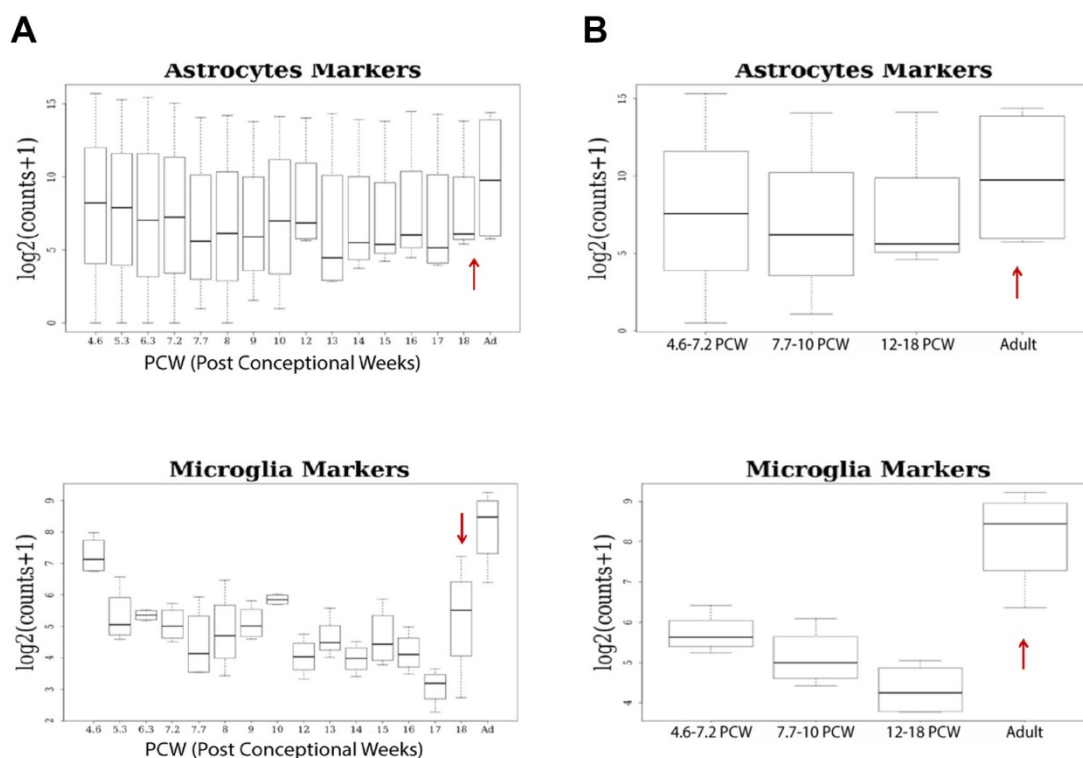

**Figure S8. The expression of astrocyte and microglia genes. (A)** Expression of marker genes was plotted as log<sub>2</sub>transformed counts at each developmental stage included in the RNA-seq analysis. The Wilcoxon rank-sum test was performed on the expression differences between developmental stages to identify *the earliest stage* with a significant and sustained increase in the expression of markers. Ad=adult retina; **(B)** Expression of markers across the three developmental windows (defined by ME-based cluster analysis) and adult retina plotted as log<sub>2</sub>transformed counts per million. The Wilcoxon rank-sum test was performed on the expression differences to identify developmental stages with *peak expression* of these markers. The red arrows indicate a significant and sustained increase in expression ( $p < 0.05$ ).

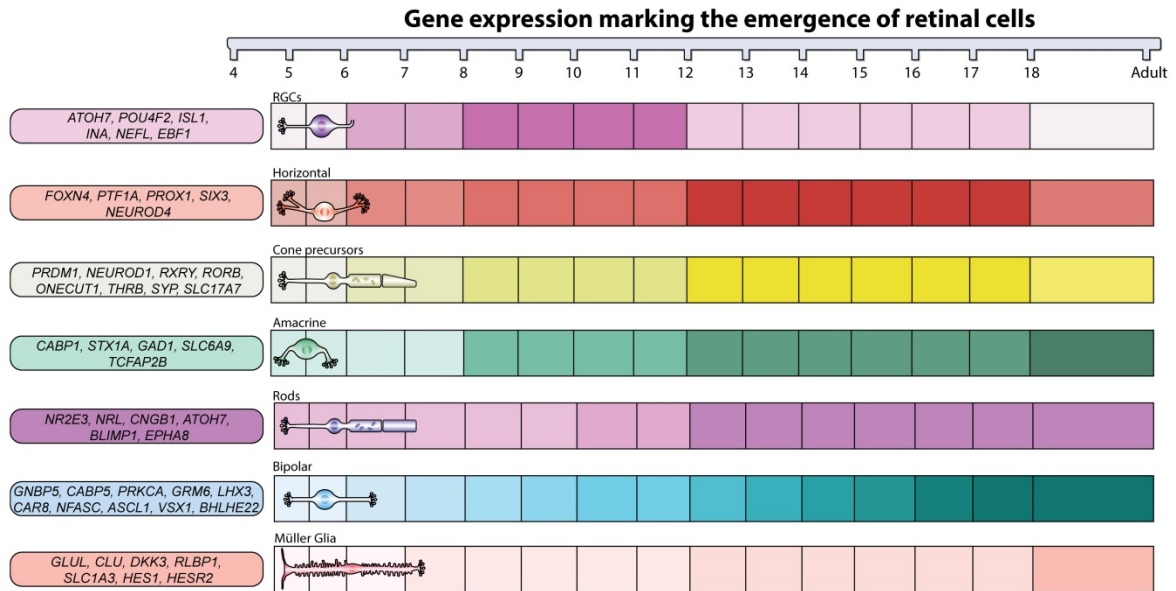

**Figure S9.** Schematic representation of retinal lineage marker expression during human retinal development. Increased colour intensity corresponds to an increase in marker expression.

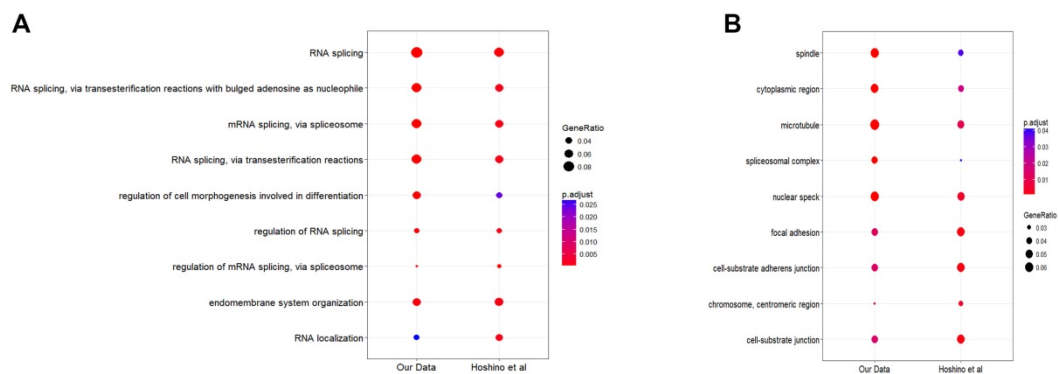

**Figure S10. Biological Theme Comparison using ClusterProfiler Compare Cluster Function reveals similarities in over-representation between our data and those published by Hoshino et al [7].** Biological processes and cellular component analysis are shown in A and B respectively.

## A circRNA expression: Development v ESC differentiation

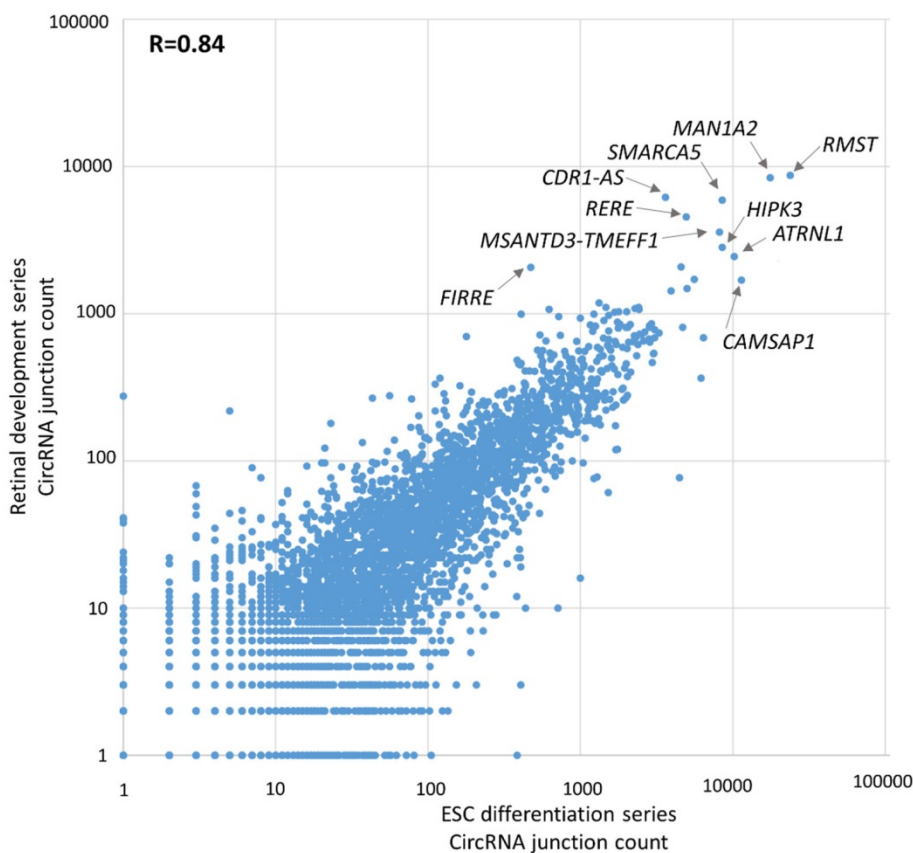

## B *RMST*: E12-E6 circRNA v canonical junctions

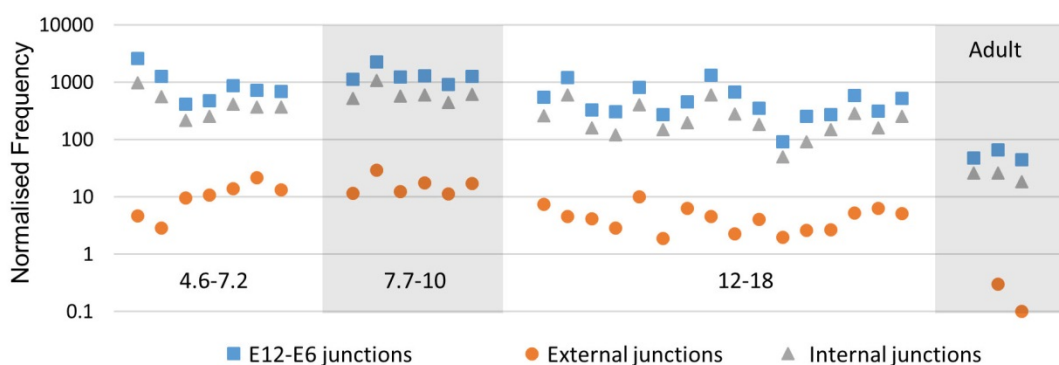

**Figure S11. (A)** Abundance of circRNAs relative to ESC retinal differentiation series (GEO data series GSE89957, [87]). Total circRNA junction counts from both series normalised to library sizes are shown, with origins of the most abundant circRNAs highlighted. *CDR1as* was not identified in the original ESC analysis, as the junctions are not within the GENCODE v19 reference set used. *FIRRE* is highlighted as it was the 2<sup>nd</sup> most abundant non-coding circRNA identified within ESCs, but is only expressed at high levels during PCW4.2-7.2. The Pearson correlation coefficient is shown. **(B)** *RMST* circRNA expression in developmental windows defined by the ME-based cluster analysis. CircRNA

junction counts from the dominant *RMST* circRNA isoform (E12-E6, chr12:97492460-97561047) are shown together with the average counts of canonical junctions internal to this circRNA (Internal: E6-E7, E7-E8...E11-E12), and the average counts of canonical junctions external to each circle (External: E1-E2,...E5-E6, E12-E13). All counts were normalised to library size.

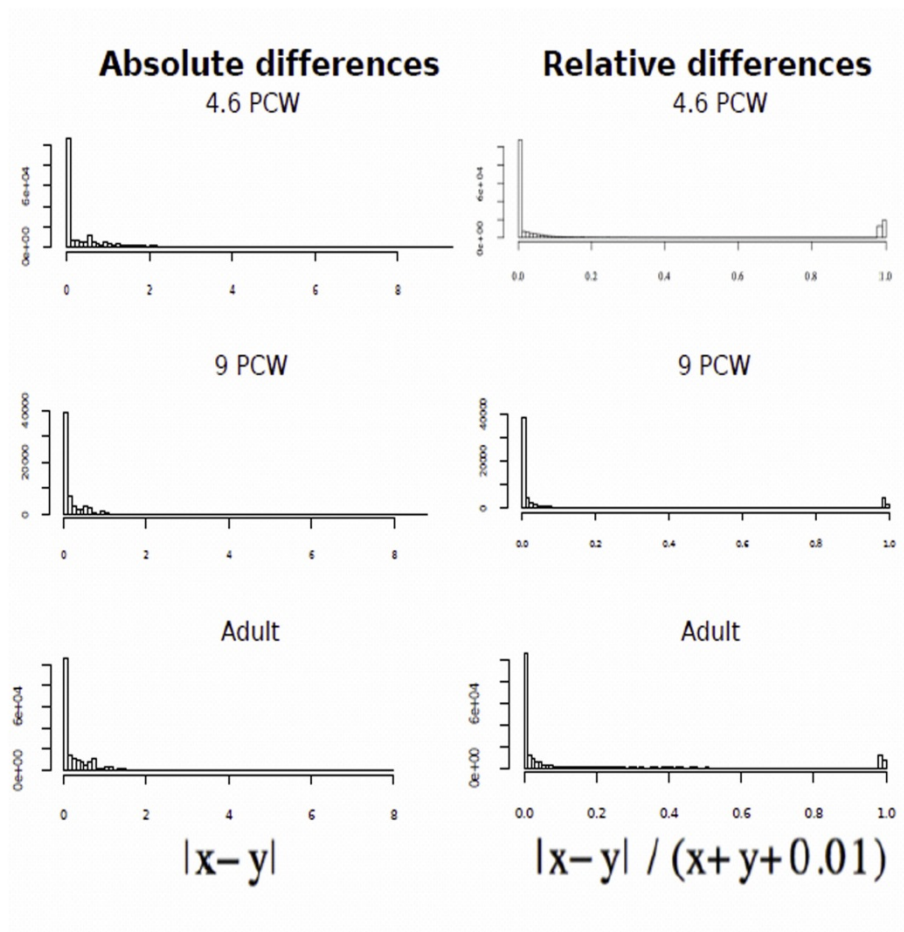

**Figure S12.** Absolute (left) and relative (right) pairwise differences of the expression of same genes across samples of the same developmental/adult stage. The expression is indicated as the logarithm of the counts. The exponential distributions are in accordance with the assumption that there is no bias in the expression between samples of the same developmental/adult stage. The relative distributions demonstrate that the counts are predominantly of the same magnitude.

**Table S1.** Summary of human embryonic and fetal specimens used for the RNA-seq analysis together with information of uniquely mapped reads.

| Age (PCW) | Embryonic/fetal stage | Tissue | Number of input reads | Average input read length | Uniquely mapped read number | Uniquely mapped reads (%) | HDBR sample ID |
|-----------|-----------------------|--------|-----------------------|---------------------------|-----------------------------|---------------------------|----------------|
| 4.6       | CS14                  | Eye    | 48635815              | 149                       | 31964221                    | 65.7                      | N12301         |
| 4.6       | CS14                  | Eye    | 45878621              | 149                       | 35184170                    | 76.6                      | N12354         |
| 4.6       | CS14                  | Eye    | 83470237              | 149                       | 73705339                    | 88.3                      | N12878         |
| 5.3       | CS16                  | Eye    | 72726041              | 149                       | 66336156                    | 91.2                      | N12556         |
| 6.3       | CS18                  | Eye    | 75793100              | 149                       | 69396960                    | 91.5                      | N12675         |
| 6.3       | CS18                  | Eye    | 70107419              | 149                       | 63024290                    | 89.9                      | N12612         |
| 7.2       | CS20                  | Eye    | 71035011              | 149                       | 62859161                    | 88.4                      | N12527         |
| 7.7       | CS22                  | Retina | 81896361              | 149                       | 74868307                    | 91.4                      | N1897          |
| 7.7       | CS22                  | Retina | 74474840              | 149                       | 68268223                    | 91.6                      | N13187         |
| 8         | CS23                  | Eye    | 90368108              | 149                       | 83047597                    | 91.9                      | N1901          |
| 9         | F1                    | Retina | 87114249              | 149                       | 79908268                    | 91.7                      | N13149         |
| 9         | F1                    | Retina | 79145487              | 149                       | 72640814                    | 91.7                      | N13159         |
| 10        | F2                    | Retina | 85520453              | 148                       | 77759984                    | 90.9                      | N12774         |
| 12        | F4                    | Retina | 77617400              | 148                       | 70601893                    | 90.9                      | N1940          |
| 13        | F5                    | Retina | 61158950              | 149                       | 53513466                    | 87.5                      | N12467         |
| 13        | F5                    | Retina | 80087667              | 148                       | 72700299                    | 90.7                      | N12915         |
| 14        | F6                    | Retina | 68108315              | 149                       | 62752723                    | 92.1                      | N13186         |
| 14        | F6                    | Retina | 73076639              | 149                       | 64905340                    | 88.8                      | N12552         |
| 14        | F6                    | Retina | 77087068              | 149                       | 69272806                    | 89.8                      | N12xxx5        |
| 15        | F7                    | Retina | 70503380              | 149                       | 56632387                    | 80.3                      | N12773         |
| 15        | F7                    | Retina | 64396321              | 149                       | 57233955                    | 88.8                      | N12xxx1        |
| 15        | F7                    | Retina | 81788089              | 149                       | 73792351                    | 90.2                      | N12xxx2        |
| 15        | F7                    | Retina | 79118938              | 149                       | 71430605                    | 90.2                      | N12xxx3        |
| 16        | F8                    | Retina | 78346354              | 149                       | 72039696                    | 91.9                      | N13132         |
| 16        | F8                    | Retina | 60797993              | 149                       | 52286174                    | 86                        | N12410         |
| 16        | F8                    | Retina | 85627649              | 149                       | 76922127                    | 89.8                      | N12638         |
| 17        | F9                    | Retina | 68388074              | 149                       | 63021906                    | 92.1                      | 17 PCW         |
| 17        | F9                    | Retina | 81083394              | 149                       | 74308837                    | 91.6                      | N12xxx4        |
| 18        | F10                   | Retina | 63936406              | 149                       | 47216106                    | 73.8                      | 18 PCW         |
| Adult     | Adult                 | Retina | 62386081              | 149                       | 50806136                    | 81.4                      | Adult          |
| Adult     | Adult                 | Retina | 56574426              | 149                       | 43224561                    | 76.4                      | Adult          |
| Adult     | Adult                 | Retina | 64500755              | 149                       | 49681505                    | 77                        | Adult          |

**Table S2.** Differential gene expression analysis for each stage of development defined by ME-based cluster analysis (comparisons performed between two sequential stages for example 4.6-7.2 PCW vs 7.7-10 PCW). Log2 fold change of  $>1$  and  $< -1$  and  $\text{padj} < 0.05$  were used as thresholds. Summary of GO terms for upregulated and downregulated genes are shown below the list of differentially expressed genes.

[Click here to download Table S2](#)

**Table S3.** Summary of transcription factors identified by iRegulon for each developmental stage defined by ME-based cluster analysis and available data on animal models retrieved from MGI and retinal disease database (OMIM).

[Click here to download Table S3](#)

**Table S4.** Differential exon usage analysis for each stage of development defined by ME-based cluster analysis (comparisons performed between two sequential stages for example 4.6-7.2 PCW vs 7.7-10 PCW). Inclusion difference  $>$ than 5%  $\text{padj} < 0.05$  were used as thresholds.

[Click here to download Table S4](#)



**Table S5.** Summary of GO terms for biological process of differentially spliced transcripts for each stage of development defined by ME-based cluster analysis (comparisons performed between two sequential stages for example 4.6-7.2 PCW vs 7.7-10 PCW).

[Click here to download Table S5](#)

**Table S6.** CircRNAs identified in all samples. Splice donor and acceptor positions, and frequency, of all back-splice junctions are given. For every back-splice, the frequencies of all canonical junctions from the transcript annotation are also given

[Click here to download Table S6](#)

**Table S7.** Normalised total circRNA junction counts per gene compared between adjacent developmental windows, defined by ME-based cluster analysis. The student t-test was used to calculate p-values, with a Benjamini-Hochberg false discovery rate of 0.05 applied (padj).

[Click here to download Table S7](#)

**Table S8.** Human circRNAs conserved between human retina (this study) and mouse (Ref 88). Human genomic co-ordinates (GRCh38) are shown for each circRNA, together with ENSEMBL transcript identifier, donor and acceptor exons, gene name, and level of conservation (none, overlapping, or precise).

[Click here to download Table S8](#)

**Table S9.** Summary of antibodies used for IHC staining.

| Antibody Name        | Catalogue Number | Source                       | Dilution |
|----------------------|------------------|------------------------------|----------|
| Acetylated tubulin   | T6793            | Sigma                        | 1:1000   |
| AP2 $\alpha$         | Sc-12726         | Santa Cruz                   | 1:200    |
| CRALBP               | GTX15051         | Genetex                      | 1:100    |
| Crx (MO2) clone 4G11 | H00001406-M02    | Abnova                       | 1:200    |
| CRYAA                |                  | Gift from Roy Quinlan        | 1:50     |
| CRYAB                |                  | Gift from Roy Quinlan        | 1:5      |
| Gat1 (K-20)          | Sc-389           | Santa Cruz                   | 1:200    |
| GFAP                 | Z0334            | Dako                         | 1:100    |
| HuCD                 | A21271           | Invitrogen                   | 1:100    |
| Islet 1/2            | Sc-30200         | Santa Cruz                   | 1:200    |
| Nrl                  | Sc-374277        | Santa Cruz                   | 1:100    |
| Opsin blue           | AB5407           | Millipore                    | 1:200    |
| Opsin red/green      | AB5405           | Millipore                    | 1:200    |
| OTX2                 | Ab114138         | Abcam                        | 1:200    |
| Pax6                 | PRB-278P         | Covance                      | 1:200    |
| PKC $\alpha$         | 610107           | BD Transduction Laboratories | 1:200    |
| RAX                  | ARP31926-P050    | Aviva Systems Biology        | 1:200    |
| Recoverin            | AB5585           | Millipore                    | 1:1000   |
| RetP1                | O4886            | Sigma                        | 1:200    |
| Rhodopsin            | Ab59260          | Abcam                        | 1:100    |
| Smi32                | SMI-32R          | Covance                      | 1:100    |
| SOX1                 | 4194S            | Cell Signalling              | 1:200    |
| SOX2                 | MAB2018          | R&D                          | 1:200    |
| VSX2                 | HPA003436        | Sigma Atlas                  | 1:200    |
